# Supplementary material
Source: PubMed Central journal article supplement (PMC2937620)
Supplement: JVI.00402-10_1.pdf [file JVI.00402-10_1.pdf]

1 *Supplementary information for:*

2 **A DISULFIDE-BONDED DIMER OF THE CORE PROTEIN OF HEPATITIS C**

3 **VIRUS IS IMPORTANT FOR VIRUS-LIKE PARTICLE PRODUCTION**

4 **Yukihiro Kushima,<sup>1,2</sup> Takaji Wakita,<sup>3</sup> Makoto Hijikata<sup>1,2</sup>**

5

6 **1. Department of Viral Oncology, Institute for Virus Research, Kyoto University,**

7 **Kyoto 606-8507, Japan**

8 **2. Graduate School of Biostudies, Kyoto University, Kyoto 606-8507, Japan**

9 **3. Department of Virology II, National Institute of Infectious Diseases, Tokyo**

10 **162-8640, Japan**

11

### Supplementary Figures and legends

12

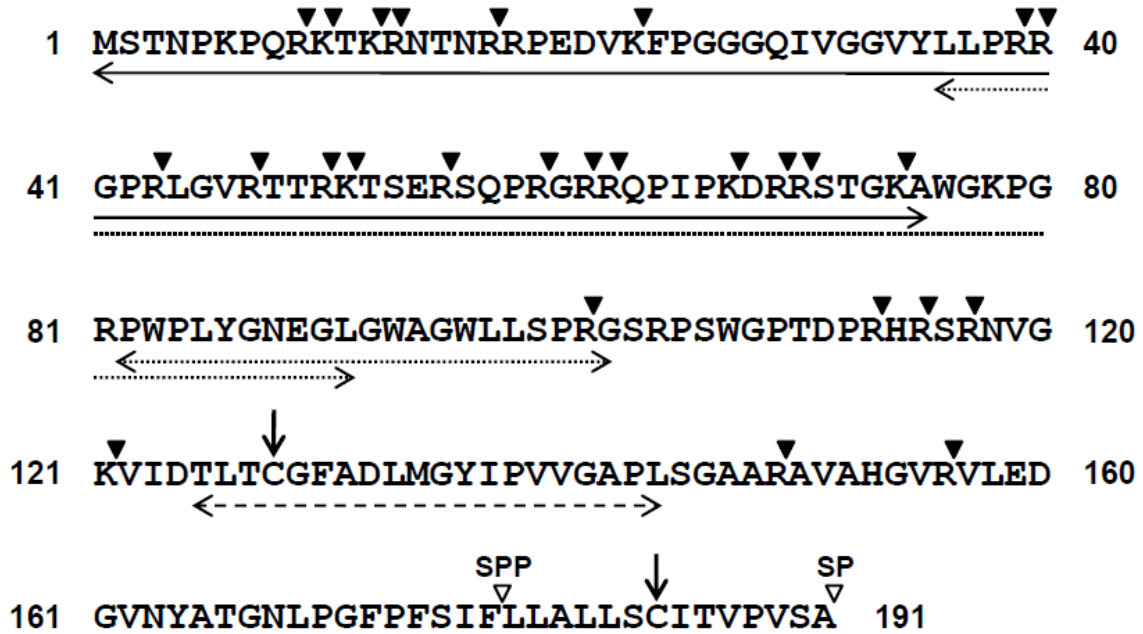

- ↔ RNA binding region
- ⋯↔ homotypic interaction region
- - -↔ LD association region

13

14

15 **Supplementary Figure 1.** JFH1<sup>E2FL</sup> core protein. Map of the reported functional  
 16 regions of the core protein from residues 1 to 191 is shown as indicated in figure. The  
 17 white arrowheads indicate signal peptidase (SP) and proposed signal peptide peptidase  
 18 (SPP) cleavage site by Okamoto et al. (37). The filled arrowheads represents potential  
 19 trypsin cleavage sites. Cystein residues of the core are indicated by arrows.

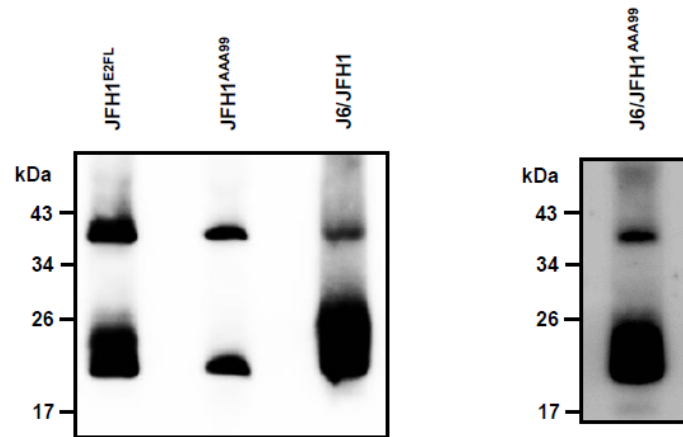

20

21

22 **Supplementary Figure 2.** Core complexes from various HCV strains. Immunoblot  
 23 analysis of core from pellets containing HCV virus particles collected following  
 24 ultracentrifugation of the concentrated culture medium from JFH1<sup>E2FL</sup>, JFH1<sup>AAA99</sup>,  
 25 J6/JFH1, or J6/JFH1<sup>AAA99</sup> RNA-transfected HuH-7 or HuH7.5 cells under non-reducing  
 26 conditions. Data are representative of three independent experiments.

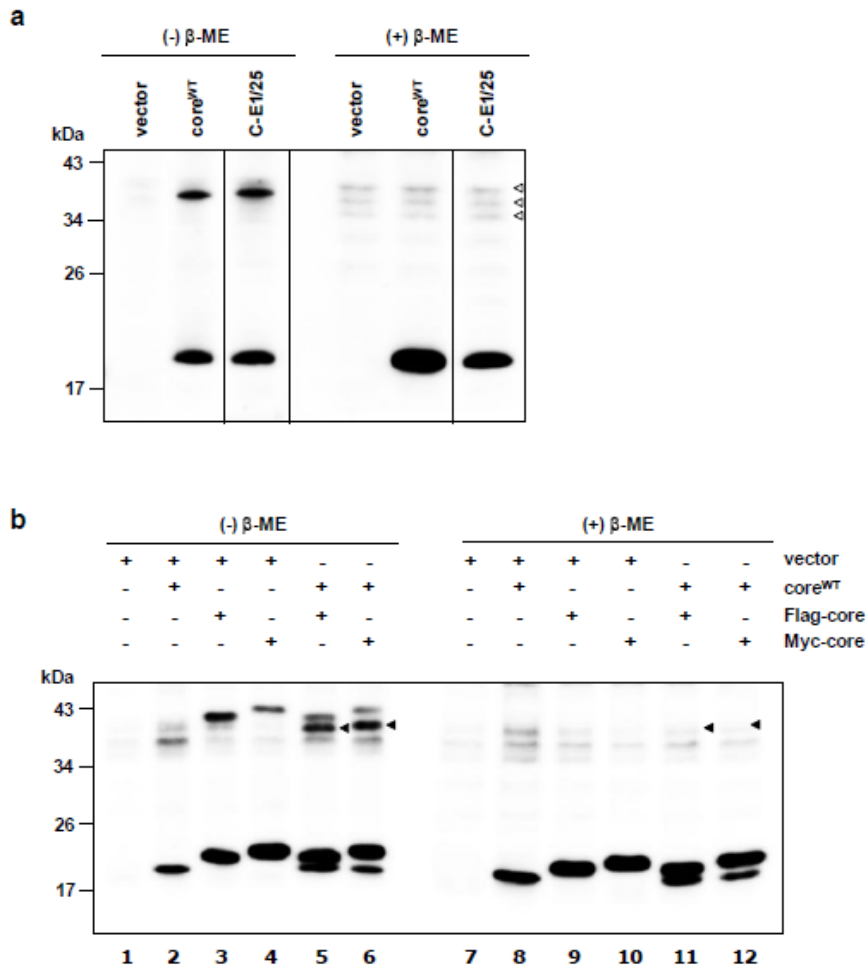

27

28

29 **Supplementary Figure 3.** Analysis of core complex in microsomal membrane fractions  
 30 (MMF) of core expressing cells. **(a)** MMF of HuH-7 cells transfected with pcDNA3  
 31 (vector), pcDNA3-core<sup>WT</sup> (core<sup>WT</sup>), or pcDNA3-C-E1/25 (C-E1/25), bearing full length  
 32 core and the N-terminal 25 amino acid sequence of E1, were subjected to non-reducing  
 33 ((-)  $\beta$ -ME) and reducing ((+)  $\beta$ -ME) SDS-PAGE and analyzed by immunoblotting  
 34 against core. Open arrowheads indicate the non-specific bands observed in MMF  
 35 samples in reducing condition which positions are close to the core dimers detected in  
 36 non-reducing condition. **(b)** Immunoblot analysis of core in the MMF collected from  
 37 HuH-7 cells transfected with pcDNA3 (vector) and/or core expression plasmids  
 38 (core191, FLAG-core, and Myc-core) as indicated. Samples were treated with or  
 39 without 5%  $\beta$ -mercaptoethanol ( $\beta$ -ME). Filled arrowheads indicate the positions of the  
 40 intermediate core complexes formed by core<sup>WT</sup> and tagged core. Data are representative  
 41 of two **(a)** or three **(b)** independent experiments.

a

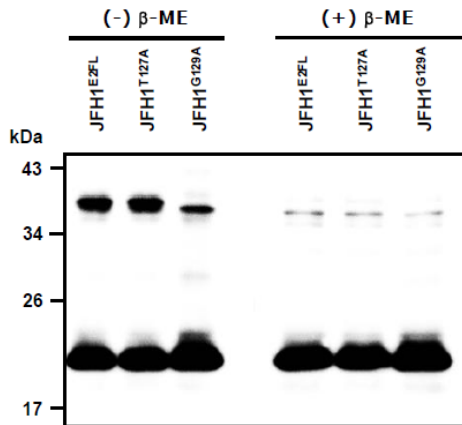

b

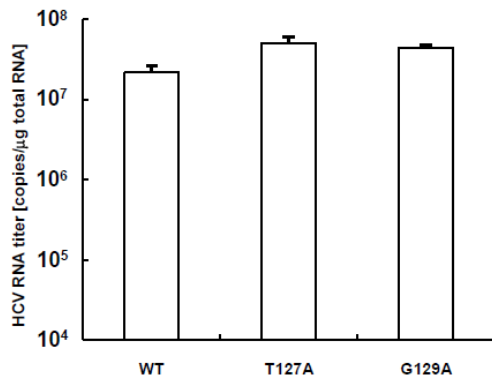

c

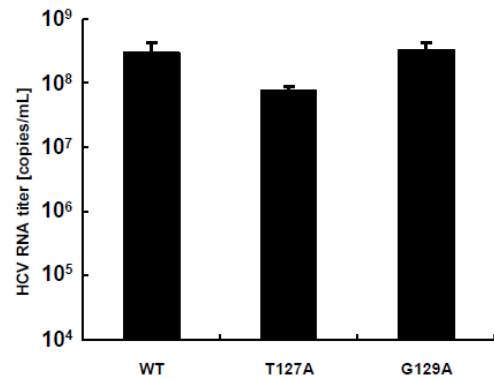

42  
43

44 **Supplementary Figure 4.** Site-directed mutagenesis of amino-acid position 127 or 129  
45 had no effect on HCV replication or the production of HCV particles. (a) Immunoblot  
46 analysis of core in microsomal membrane fractions collected on day 3 post-transfection  
47 from cells transfected with JFH1<sup>E2FL</sup> (WT), JFH1<sup>T127A</sup> (T127A), or JFH1<sup>G129A</sup> RNA.  
48 Samples were treated with or without 5% β-mercaptoethanol (β-ME). (b, c) Real-time  
49 qRT-PCR analysis of HCV RNA titers in total cellular RNA (b) or culture medium (c)  
50 collected on day 5 post-transfection. Data are representative of three independent  
51 experiments (a) or are the means ± s.d. from three independent experiments (b, c).

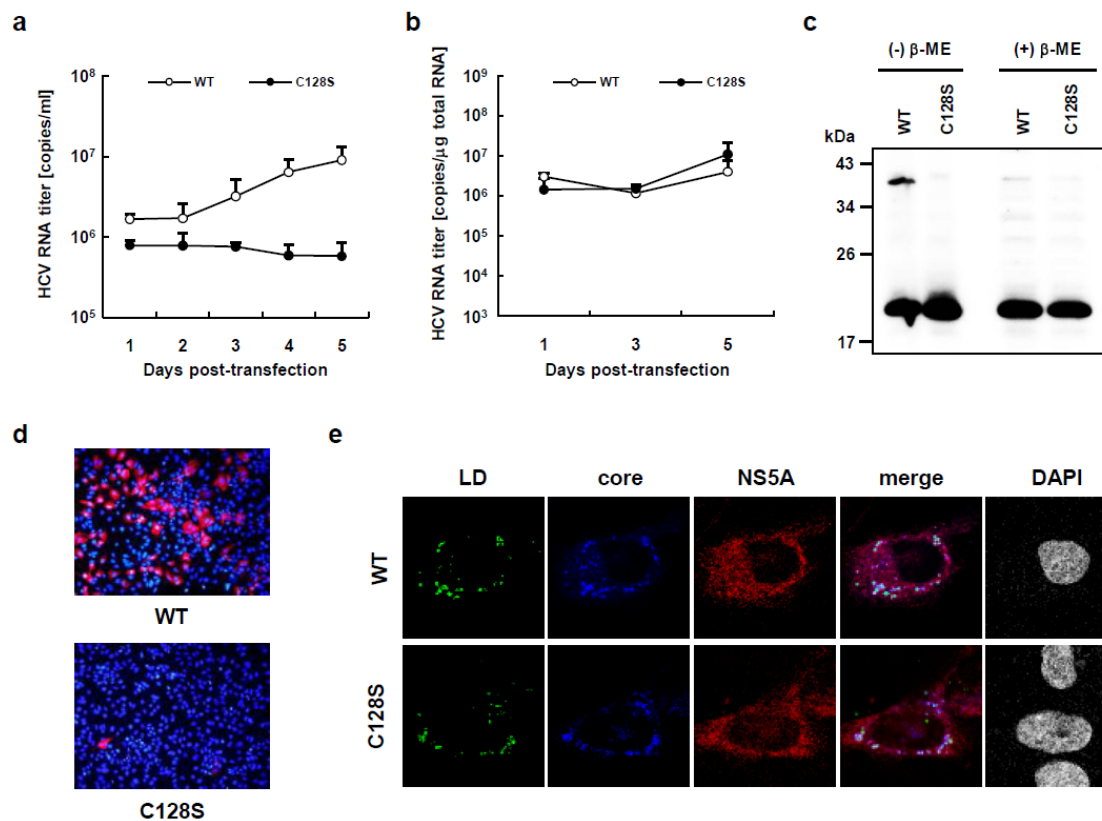

52

53

54 **Supplementary Figure 5.** Analysis of core C128S mutant. (a) Real-time qRT-PCR  
 55 analysis of HCV RNA titers in culture medium collected at the indicated time points  
 56 from HuH-7 cells transfected with JFH1<sup>E2FL</sup> (WT, open circles) or JFH1<sup>C128S</sup> (C128S,  
 57 filled circles) RNA. (b) Real-time qRT-PCR analysis of the HCV RNA titer using total  
 58 cellular RNA collected at the indicated time points from cells transfected with WT  
 59 (open circles) or (C128S) (filled circles). (c) Immunoblot analysis of core in microsomal  
 60 membrane fraction collected on day 3 post-transfection from cells transfected with  
 61 JFH1<sup>E2FL</sup> (WT) or JFH1<sup>C128S</sup> RNA (C128S). (d) Infectivity of culture medium collected  
 62 and concentrated on day 5 post-transfection from HuH-7 cells transfected with WT or  
 63 C128S RNA. (e) Confocal microscopy of the subcellular localization of the LD (green),  
 64 core (blue), NS5A (red), and nucleus (DAPI) (grey) in cells transfected with JFH1<sup>E2FL</sup>  
 65 (WT) or JFH1<sup>C128S</sup> RNA (C128S) on day 3 post-transfection. Data are the means ± s.d.  
 66 from three independent experiments (c, b) or are representative of three independent  
 67 experiments (c, d, e).

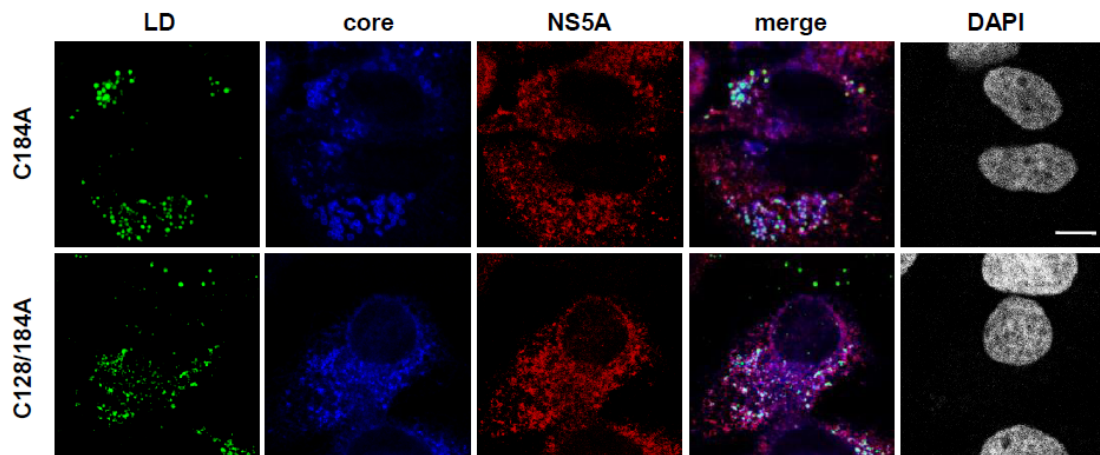

68

69

70 **Supplementary Figure 6.** Subcellular localization of HCV proteins. Confocal  
 71 microscopy of the subcellular localizations of the lipid droplet (LD), core, NS5A, and  
 72 the nucleus (DAPI) three days post-transfection with JFH1<sup>C184A</sup> (C184A) or  
 73 JFH1<sup>C128/184A</sup> (C128/184A). Scale bar indicates 10  $\mu$ m. Data are representative of three  
 74 independent experiments.

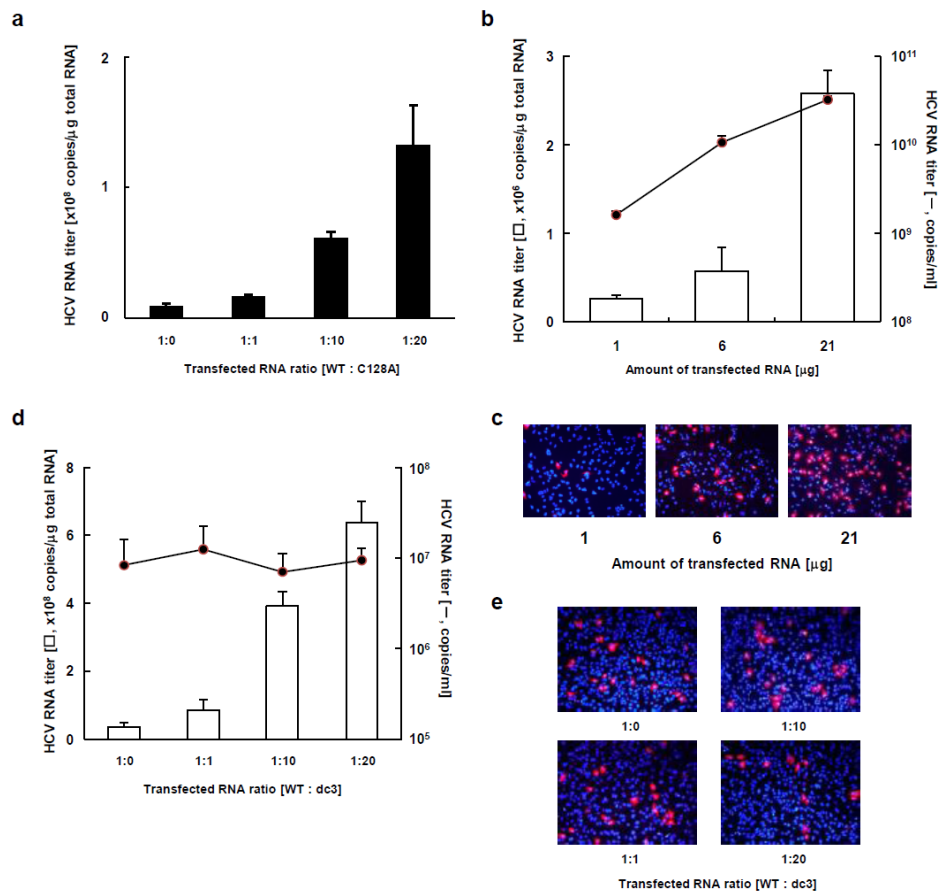

75

76

77 **Supplementary Figure 7.** Transfection of various amounts of HCV RNA had no  
 78 effect on HCV replication. (a) Real-time qRT-PCR analysis of the HCV RNA titer in  
 79 total cellular RNA collected on day 3 post-transfection from HuH-7 cells transfected  
 80 with the indicated RNA ratio of JFH1<sup>E2FL</sup> (WT) or JFH1<sup>C128A</sup> (C128A) RNA. (b)  
 81 Real-time qRT-PCR analysis of the HCV RNA titer in total cellular RNA (open bars) or  
 82 culture medium (filled circles) collected on day 3 post-transfection from HuH-7 cells  
 83 transfected with the indicated amount of JFH1<sup>E2FL</sup> RNA. (d) Real-time qRT-PCR  
 84 analysis of the HCV RNA titer in total cellular RNA (open bars) or culture medium  
 85 (filled circles) collected on day 3 post-transfection from HuH-7 cells transfected with  
 86 the indicated ratio of WT and JFH1<sup>dc3</sup> (dc3) RNA. (c, e) The infectivity of culture  
 87 medium collected from HuH-7 cells transfected with the indicated amount of JFH1<sup>E2FL</sup>  
 88 RNA (c) and culture medium collected from HuH-7 cells transfected with the indicated  
 89 ratio of WT and JFH1<sup>dc3</sup> (dc3) RNA (e) were analyzed as described in the Materials and  
 90 Methods. Data are the means  $\pm$  s.d. from three independent experiments (a, b, d) or are  
 91 representative of three independent experiments (c, e).



| Plasmid name                 | Primer sequences (5'-3')                                                   | Template for PCR       | Restriction enzyme site | Original plasmid      |
|------------------------------|----------------------------------------------------------------------------|------------------------|-------------------------|-----------------------|
| pJFH1 <sup>T127A</sup>       | CACGACGTTGTAAAACGACG                                                       | pJFH1 <sup>E2FL</sup>  | EcoRI / BsiWI           | pJFH1 <sup>E2FL</sup> |
|                              | ATCGACACCCTAGCGTGTGGCTT                                                    |                        |                         |                       |
|                              | ATGTCTATGATGACCTCGGG                                                       |                        |                         |                       |
| pJFH1 <sup>C128A</sup>       | CACGACGTTGTAAAACGACG                                                       | pJFH1 <sup>E2FL</sup>  | EcoRI / BsiWI           | pJFH1 <sup>E2FL</sup> |
|                              | ACCCTAACGGCTGGCTTTGCC                                                      |                        |                         |                       |
|                              | ATGTCTATGATGACCTCGGG                                                       |                        |                         |                       |
| pJFH1 <sup>C128S</sup>       | CACGACGTTGTAAAACGACG                                                       | pJFH1 <sup>E2FL</sup>  | EcoRI / BsiWI           | pJFH1 <sup>E2FL</sup> |
|                              | ACCCTAACGTCTGGCTTTGCC                                                      |                        |                         |                       |
|                              | ATGTCTATGATGACCTCGGG                                                       |                        |                         |                       |
| pJFH1 <sup>G129A</sup>       | CACGACGTTGTAAAACGACG                                                       | pJFH1 <sup>E2FL</sup>  | EcoRI / BsiWI           | pJFH1 <sup>E2FL</sup> |
|                              | ACCCTAACGTGTGCCTTTGCCGACCTC                                                |                        |                         |                       |
|                              | ATGTCTATGATGACCTCGGG                                                       |                        |                         |                       |
| pJFH1 <sup>C184A</sup>       | CACGACGTTGTAAAACGACG                                                       | pJFH1 <sup>E2FL</sup>  | EcoRI / BsiWI           | pJFH1 <sup>E2FL</sup> |
|                              | CCTGTTGTCCGCCATCACCGTTC                                                    |                        |                         |                       |
|                              | ATGTCTATGATGACCTCGGG                                                       |                        |                         |                       |
| pJFH1 <sup>C128/184A</sup>   | CACGACGTTGTAAAACGACG                                                       | pJFH1 <sup>C184A</sup> | EcoRI / BsiWI           | pJFH1 <sup>E2FL</sup> |
|                              | ACCCTAACGGCTGGCTTTGCC                                                      |                        |                         |                       |
|                              | ATGTCTATGATGACCTCGGG                                                       |                        |                         |                       |
| pcDNA3-C-E1/25               | tgataAAGCTTCACCATGAGCACAAATCC                                              | pJFH1 <sup>E2FL</sup>  | HindIII / EcoRI         | pcDNA3                |
|                              | taataGAATTCTCACGGGGACGTGGAGAACCG                                           |                        |                         |                       |
| pcDNA3-FLAG-core             | tgataAAGCTTACCATTGACTACAAGGATGAC<br>GATGACAAGATGAGCACAAATCCTAAAC           | pJFH1 <sup>E2FL</sup>  | HindIII / EcoRI         | pcDNA3                |
|                              | taataGAATTCTCAAGCAGAGACCGGAACG                                             |                        |                         |                       |
| pcDNA3-Myc-core              | tgataAAGCTTACCATTGGAACAAAACTCATC<br>TCAGAAGAGGATCTGATGAGCACAAATCC<br>TAAAC | pJFH1 <sup>E2FL</sup>  | HindIII / EcoRI         | pcDNA3                |
|                              | taataGAATTCTCAAGCAGAGACCGGAACG                                             |                        |                         |                       |
| pcDNA3-core <sup>C128A</sup> | tgataAAGCTTCACCATGAGCACAAATCC                                              | pJFH1 <sup>C128A</sup> | HindIII / EcoRI         | pcDNA3                |
|                              | taataGAATTCTCAAGCAGAGACCGGAACG                                             |                        |                         |                       |

92

93

94 **Supplementary Table.** The sets of primers used to amplify the target genes, template  
95 plasmids used in the PCRs, restriction sites, and plasmids into which the amplified DNA  
96 fragments were inserted are shown.
